# Supplementary material
Source: publisher site journal article supplement (https://www.spandidos-publications.com/8569/downloadSupplementary)
Supplement: Supplementary file 1 [file downloadSupplementary]

Table SI. Univariable Cox proportional hazards regression analysis for OS and DFS in patients with rectal cancer receiving NCRT.

| Characteristic      | OS HR (95% CI)   | P-value | DFS HR (95% CI)  | P-value |
|---------------------|------------------|---------|------------------|---------|
| Age                 | 1.01 (0.99-1.02) | 0.412   | 1.00 (0.98-1.02) | 0.765   |
| Sex                 | 1.12 (0.85-1.48) | 0.382   | 1.08 (0.81-1.44) | 0.521   |
| CEA                 | 1.02 (1.01-1.03) | <0.001  | 1.02 (1.01-1.03) | <0.001  |
| CA 19-9             | 1.00 (0.99-1.01) | 0.452   | 1.01 (0.99-1.02) | 0.218   |
| Neutrophils         | 1.28 (1.14-1.44) | <0.001  | 1.25 (1.12-1.39) | <0.001  |
| LYM                 | 0.52 (0.38-0.71) | <0.001  | 0.48 (0.35-0.66) | <0.001  |
| MONO                | 1.05 (0.88-1.25) | 0.590   | 1.03 (0.85-1.24) | 0.763   |
| EOS                 | 1.42 (1.09-2.42) | 0.031   | 1.85 (1.52-3.44) | 0.001   |
| ALB                 | 0.98 (0.95-1.02) | 0.315   | 0.99 (0.96-1.03) | 0.642   |
| Globulin            | 1.01 (0.97-1.05) | 0.678   | 1.00 (0.96-1.04) | 0.912   |
| Post-NCRT NLR group | 3.25 (2.15-4.92) | <0.001  | 2.78 (1.92-4.03) | <0.001  |

HR, hazard ratio; CI, confidence interval; NCRT, neoadjuvant chemoradiotherapy; CEA, carcinoembryonic antigen; LYM, lymphocyte count; EOS, eosinophil count; NLR, neutrophil-to-lymphocyte ratio; MONO, monocytes; OS, overall survival; DFS, disease-free survival.

Table SII. Multicollinearity diagnostics for variables included in the multivariable models.

| Variable            | VIF (OS model) | VIF (DFS model) |
|---------------------|----------------|-----------------|
| CEA                 | 1.12           | 1.14            |
| Neutrophils         | 2.76           | 2.82            |
| LYM                 | 1.15           | 1.22            |
| EOS                 | 1.08           | 1.07            |
| Post-NCRT NLR group | 2.54           | 2.61            |

VIF, variance inflation factor; OS, overall survival; DFS, disease-free survival. CEA, carcinoembryonic antigen; LYM, lymphocyte count; EOS, eosinophil count; NLR, neutrophil-to-lymphocyte ratio.

Table SIII. Sensitivity analysis of multivariable cox regression models for overall survival stratified by treatment period.

| Characteristic                               | Adjusted HR (95% CI) (2017-2019) | P-value | Adjusted HR (95% CI) (2020-2022 ) | P-value | P-value for interaction |
|----------------------------------------------|----------------------------------|---------|-----------------------------------|---------|-------------------------|
| Pre-NCRT variables                           |                                  |         |                                   |         |                         |
| CEA (per 1 ng/ml increase)                   | 1.01 (1.01-1.02)                 | <0.001  | 1.01 (1.00-1.02)                  | 0.011   | 0.63                    |
| Neutrophils (per $1 \times 10^9/l$ increase) | 1.19 (1.04-1.35)                 | 0.010   | 1.13 (1.05-1.31)                  | 0.026   | 0.51                    |
| LYM (per $1 \times 10^9/l$ increase)         | 0.62 (0.41-0.93)                 | 0.022   | 0.71 (0.46-0.91)                  | 0.018   | 0.57                    |
| EOS (per $1 \times 10^9/l$ increase)         | 1.51 (1.02-2.39)                 | 0.046   | 1.48 (1.03-2.24)                  | 0.047   | 0.61                    |
| Post-NCRT variable                           |                                  |         |                                   |         |                         |
| NLR group (high vs. low)                     | 2.84 (1.67-4.85)                 | <0.001  | 2.41 (1.31-4.44)                  | 0.005   | 0.64                    |

HR, hazard ratio; CI, confidence interval; NCRT, neoadjuvant chemoradiotherapy; CEA, carcinoembryonic antigen; LYM, lymphocyte count; EOS, eosinophil count; NLR, neutrophil-to-lymphocyte ratio.

Table SIV. Sensitivity analysis of multivariable Cox regression models for disease-free survival stratified by treatment period.

| Characteristic                               | Adjusted HR (95% CI) (2017-2019) | P-value | Adjusted HR (95% CI) (2020-2022 ) | P-value | P-value for interaction |
|----------------------------------------------|----------------------------------|---------|-----------------------------------|---------|-------------------------|
| Pre-NCRT variables                           |                                  |         |                                   |         |                         |
| CEA (per 1 ng/ml increase)                   | 1.01 (1.01-1.02)                 | 0.001   | 1.01 (1.00-1.02)                  | 0.004   | 0.710                   |
| Neutrophils (per $1 \times 10^9/l$ increase) | 1.15 (1.04-1.27)                 | 0.007   | 1.10 (1.01-1.23)                  | 0.011   | 0.600                   |
| LYM (per $1 \times 10^9/l$ increase)         | 0.53 (0.38-0.74)                 | <0.001  | 0.58 (0.41-0.83)                  | 0.003   | 0.670                   |
| EOS (per $1 \times 10^9/l$ increase)         | 2.63 (1.13-6.14)                 | 0.025   | 2.19 (1.09-5.00)                  | 0.022   | 0.780                   |
| Post-NCRT variable                           |                                  |         |                                   |         |                         |
| NLR group (high vs. low)                     | 2.31 (1.45-3.67)                 | <0.001  | 2.09 (1.27-3.43)                  | 0.004   | 0.810                   |

HR, hazard ratio; CI, confidence interval; NCRT, neoadjuvant chemoradiotherapy; CEA, carcinoembryonic antigen; LYM, lymphocyte count; EOS, eosinophil count; NLR, neutrophil-to-lymphocyte ratio.
